# Supplementary material for: Profiles of histidine-rich glycoprotein associate with age and risk of all-cause mortality
Source: Life Sci Alliance. 2020 Jul 31;3(10):e202000817. doi: 10.26508/lsa.202000817 (PMC7409555; doi:10.26508/lsa.202000817)
Supplement: Supplementary file 4 [file LSA-2020-00817_TableS3.xls]

## Sheet: TableS3
Supplementary Table 3. Enzymes used for digestion of plasma pool for MS/MS analysis
Enzyme	Enzyme : Substrate ratio	Digestion time (hours)
GluC	1:50	16
LysN	1:100	16
LysC	1:100	16
Chymotrypsin	1:50	16
Trypsin	1:50	1
