# Supplementary material for: Profiles of histidine-rich glycoprotein associate with age and risk of all-cause mortality
Source: Life Sci Alliance. 2020 Jul 31;3(10):e202000817. doi: 10.26508/lsa.202000817 (PMC7409555; doi:10.26508/lsa.202000817)
Supplement: Supplementary file 5 [file LSA-2020-00817_TableS4.xls]

## Sheet: TableS4
Supplementary Table 4. The results of stratified analysis of HPA045005 by genotype of rs9898.
Genotype	Amino acid	N	Death	HR* (hazard ratio)	HR P value*	Average age (yr) ‡	Coefficient (β) †	LM P value†
CC	Proline	1094	139	1.32	0.012	65.6	0.0007	0.23
CT	Pro, Ser	970	125	1.3	0.015	66.4	0.0027	6.9 ´ 10‑5
TT	Serine	243	31	1.19	0.27	65.8	0.005	1.6 ´ 10‑3
* Cox proportional hazards models using age-adjusted HRG level from HPA045005.
† Linear regression models for age and HRG level from HPA045005. The coefficients are the estimates of how much log of the HRG levels increase per year of age.
‡ The association of age with genotype was tested by ANOVA and not significant (P = 0.1).
