# Supplementary material for: Profiles of histidine-rich glycoprotein associate with age and risk of all-cause mortality
Source: Life Sci Alliance. 2020 Jul 31;3(10):e202000817. doi: 10.26508/lsa.202000817 (PMC7409555; doi:10.26508/lsa.202000817)
Supplement: Supplementary file 7 [file LSA-2020-00817_TableS6.xls]

## Sheet: TableS6
Supplementary Table 6. Summary of survival analyses
Predictor*	Samples	N	Nr of deaths	Covariates	Hazard ratio (95% CI)	P value
HRG	All	2973	362	Sex		1.13 × 10-4
BSI0137	All	2973	362	Sex		0.57
std_HRG§	All	2973	362	Sex	1.25 (1.12-1.39)	6.45 × 10-5
std_HRG§	All	2307	295	Sex, rs9898	1.31 (1.15-1.50)	7.75 × 10‑5
std_HRG§	Females	1602	160		1.35 (1.15-1.58)	2.13 × 10‑4
std_HRG§	Males	1371	202		1.15 (0.99-1.34)	0.059
1st vs. 4th quartile	2 quartiles	1488	188	Sex	1.54 (1.27-2.28)	3.87 × 10-3
CRP	All	2971	362	Sex	1.07 (1.01-1.14)	0.023
age-adjusted CRP	All	2971	362	Sex	1.01 (1.00-1.02)	0.023
std_HRG§	All	2971	362	CRP, Sex	1.24 (1.11-1.38)	1.05 × 10-4
std_HRG§	All	2971	362	APOA1, Sex	1.24 (1.11-1.38)	1.10 × 10-4
std_HRG§	All	2971	362	APOB, Sex	1.25 (1.12-1.39)	6.56 × 10-5
std_HRG§	All	2973	362	Glucose, Sex	1.26 (1.13-1.40)	3.88 × 10-5
std_HRG§	All	2972	362	Hb, Sex	1.22 (1.09-1.36)	3.66 × 10-4
std_HRG§	All	2970	361	HbA1c, Sex	1.26 (1.12-1.40)	3.51 × 10-5
std_HRG§	All	2973	362	HDL, Sex	1.24 (1.12-1.39)	5.82 × 10-5
std_HRG§	All	2973	362	LDL, Sex	1.27 (1.13-1.41)	2.94 × 10-5
std_HRG§	All	2973	362	TC, Sex	1.24 (1.12-1.39)	8.37 × 10-5
std_HRG§	All	2973	362	TG, Sex	1.25 (1.12-1.39)	5.10 × 10-5
std_HRG§	All	2973	99 (neoplasm)	Sex	1.28 (1.04-1.57)	1.73 × 10-2
std_HRG§	All	2973	103 (circulatory)	Sex	1.46 (1.19-1.79)	2.80 × 10-4
std_HRG§	All	2973	44 (others)	Sex	1.20 (0.88-1.64)	0.25
* HRG profiles obtained by HPA045005.
§ standardized HPA045005-derived HRG values by linear regression and scaling. They were the scaled residuals from the linear regression model with age and age squared for each sex.
